# Supplementary material for: Super-resolution kinetochore tracking reveals the mechanisms of human sister kinetochore directional switching
Source: eLife journal article supplement (doi:10.7554/elife.09500), 2015-10-13
Supplement: supp [file elife-09500-supp-v1.zip]

Archive with 9 entries (9 files):
- elife_poa_e09500_Video_4.mov
- elife_poa_e09500_Video_5.mov
- elife_poa_e09500_Figure_2_figure_supplement_1.pdf
- elife_poa_e09500_Video_6.mov
- elife_poa_e09500_Video_1.mov
- elife_poa_e09500_Figure_4_figure_supplement_1.pdf
- elife_poa_e09500_Video_3.mov
- elife_poa_e09500_Figure_4_figure_supplement_2.pdf
- elife_poa_e09500_Video_2.mov
