# Supplementary figures and images for: Super-resolution kinetochore tracking reveals the mechanisms of human sister kinetochore directional switching
Source: eLife journal article supplement (doi:10.7554/elife.09500), 2015-10-13

Figure 4-figure supplement 1

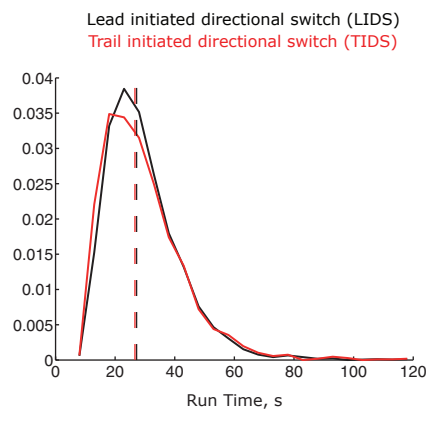

Supplement: supp [file elife-09500-supp-v1.zip]

Figure 4-figure supplement 2

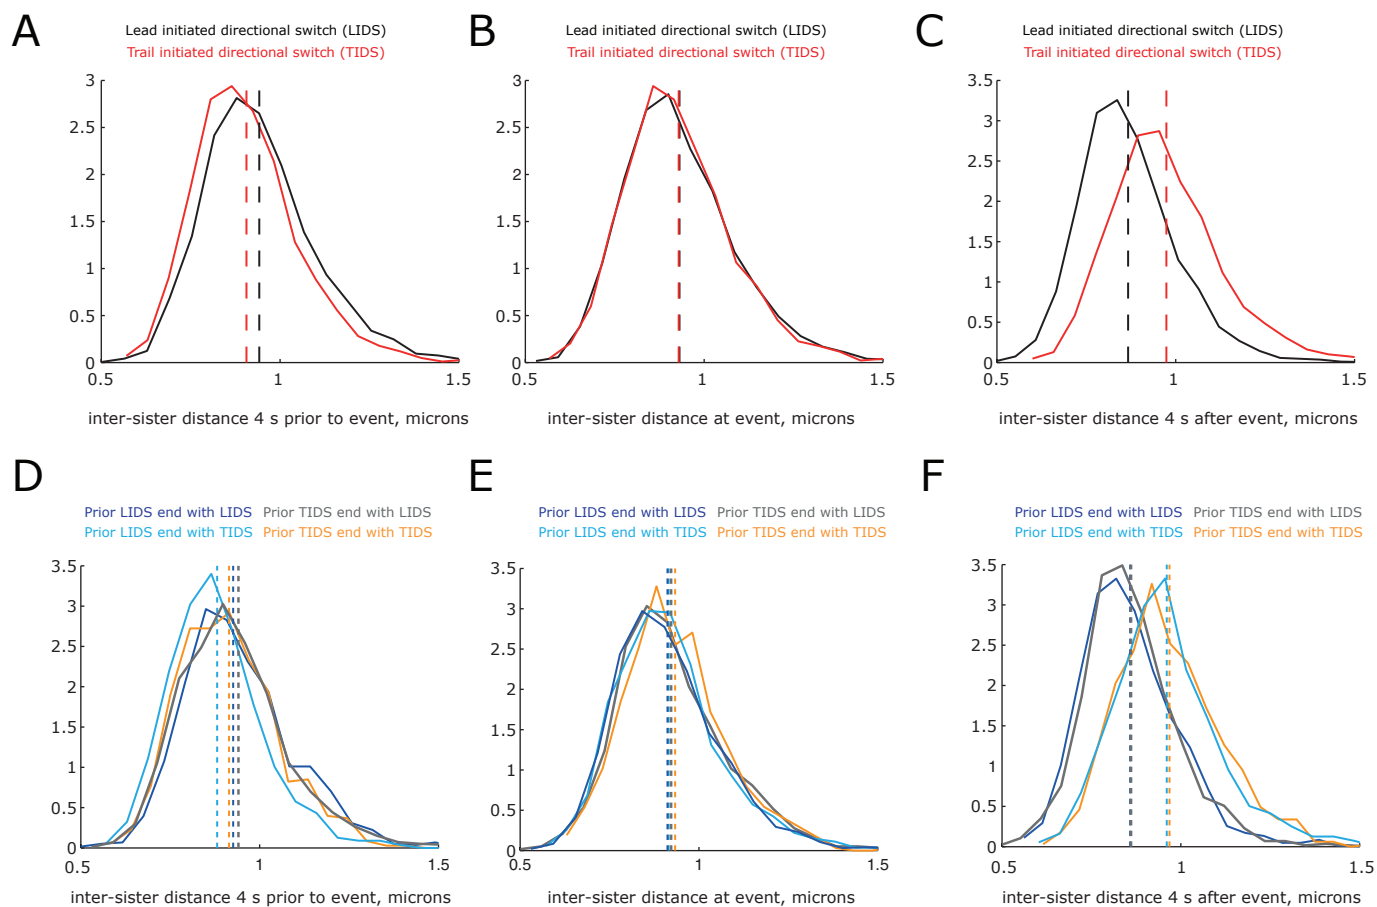

Supplement: supp [file elife-09500-supp-v1.zip]

Figure 2-figure supplement 1

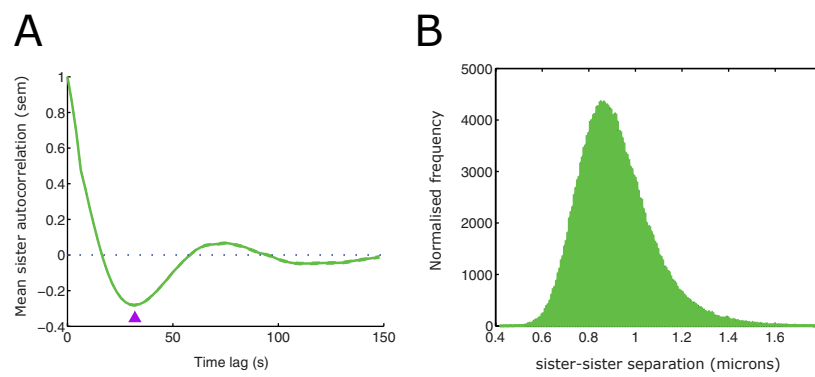

Supplement: supp [file elife-09500-supp-v1.zip › elife_poa_e09500_Figure_2_figure_supplement_1.pdf]
